# Supplementary material
Source: publisher figshare collection journal article supplement (https://karger.figshare.com/ndownloader/files/14356892)
Supplement: Supplementary file 1 [file 14356892]

**Table S1.** Virginia Maryland College of Veterinary Medicine’s Phase IV Animal Vivarium Excludes Numerous Pathogens


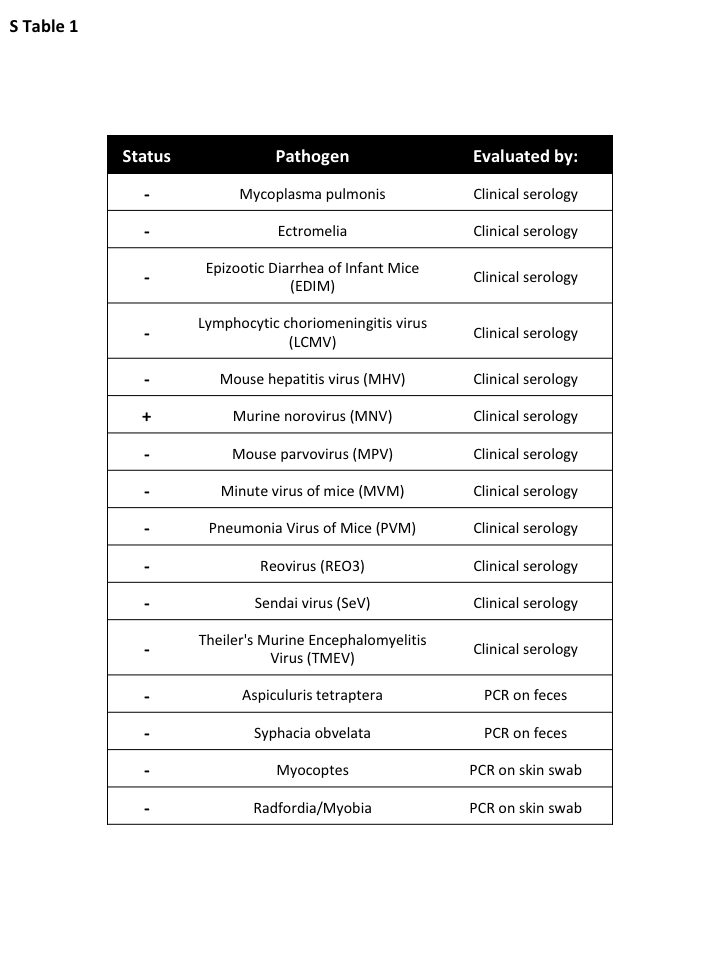


The status of the animal housing facility is regularly updated after evaluation for pathogen detection using standard best practices. Pathogens not listed are not routinely screened, and therefore may be present in the colony.
